# Supplementary material for: Development of an EAM potential for zinc and its application to the growth of nanoparticles
Source: Royal Society of Chemistry journal article supplement (doi:10.1039/b820278h), 2009-01-01
Supplement: b820278h.pdf [file b820278h.pdf]

**Electronic supplementary material Table 1:** Fit parameters of the zinc EAM potential. The parameters of Eq. 10 can be calculated from  $F'(\rho_e)$  and  $F''(\rho_e)$  with the equations given below derived here to implement the constraints of the embedding function.

| <i>parameter</i>                                 | <i>value</i>              |
|--------------------------------------------------|---------------------------|
| $f_e / 10^{-18} \text{ C nm}^{-3}$               | 0.56638674                |
| $\beta$                                          | 5.75486                   |
| $Z_e / 10^{-18} \text{ C}$                       | 0.021945331               |
| $\alpha$                                         | 4.2369                    |
| $F(\rho_e) / \text{eV}$                          | -1.73505924326            |
| $F'(\rho_e) / \text{eV nm}^3 \text{ C}^{-1}$     | $-2.248592 \cdot 10^{17}$ |
| $F''(\rho_e) / \text{eV nm}^6 \text{ C}^{-2}$    | $5.0047652 \cdot 10^{31}$ |
| $F_{b3} / \text{eV nm}^9 \text{ C}^{-3}$         | $1.3050788 \cdot 10^{51}$ |
| $r_e / \text{nm}$                                | 0.2665                    |
| $\rho_e / 10^{-18} \text{ C nm}^{-3}$            | 5.7382624                 |
| $\rho_{\text{max}} / 10^{-18} \text{ C nm}^{-3}$ | 21.083445                 |

$$F_{a0} = \frac{F(\rho_e)}{\rho_e}$$

$$F_{a1} = \frac{F'(\rho_e)\rho_e - F(\rho_e)}{\rho_e^2}$$

$$F_{a2} = \frac{F''(\rho_e)\rho_e^2 - 2F'(\rho_e)\rho_e + 2F(\rho_e)}{3\rho_e^2}$$

$$F_{b0} = F(\rho_e)$$

$$F_{b1} = F'(\rho_e)$$

$$F_{b2} = 0.5 F''(\rho_e)$$

**Electronic supplementary material Table 2:** CNA signatures for the hcp structure. The letters A and B indicate to which layer of the plane the atom belongs, in case the surface consists of two planes. Existing structures with the same signature are listed too.

| <i>Structure</i>                                                                  | <i>#nn</i> | <i>CNA(#),...</i>                              |
|-----------------------------------------------------------------------------------|------------|------------------------------------------------|
| Bulk                                                                              | 12         | 422(6), 421(6)                                 |
| (0001) A/B- layer $\equiv$ <i>fcc</i> (111) plane                                 | 9          | 421(3), 311(6)                                 |
| (10 $\bar{1}$ 0) A-layer $\equiv$ <i>icosa. surface edge</i>                      | 8          | 422(2), 322(2), 311(4)                         |
| (10 $\bar{1}$ 0) B- layer $\equiv$ <i>deca. bulk</i>                              | 10         | 422(2), 421(2), 311(4), 300(2)                 |
| (1 $\bar{1}$ 00) A- layer                                                         | 6          | 422(2), 211(2), 100(2)                         |
| (1 $\bar{1}$ 00) B- layer                                                         | 10         | 422(2), 421(4), 322(2), 211(2)                 |
| (10 $\bar{1}$ 1) A- layer $\equiv$ (1 $\bar{1}$ 01) B $\equiv$ (1 $\bar{1}$ 02) B | 9          | 422(2), 421(2), 322(2), 311(2), 211(1)         |
| (1 $\bar{1}$ 01) A- layer $\equiv$ (10 $\bar{1}$ 1) B $\equiv$ (10 $\bar{1}$ 2) B | 8          | 422(2), 421(1), 311(2), 211(1), 200(2)         |
| (10 $\bar{1}$ 2) A- layer $\equiv$ <i>fcc</i> (111)-(100) edge                    | 7          | 421(2), 311(2), 211(3)                         |
| (1 $\bar{1}$ 02) A- layer $\equiv$ <i>fcc</i> (111)-(111) edge                    | 7          | 421(1), 311(4), 200(2)                         |
| (11 $\bar{2}$ 0) A/B- layer $\equiv$ <i>deca. notch vertex</i>                    | 7          | 422(1), 322(1), 311(2), 300(1), 200(2)         |
| (11 $\bar{2}$ 1) A/B- layer                                                       | 7          | 422(1), 421(1), 322(1), 311(1), 211(2), 200(1) |
| (11 $\bar{2}$ $\frac{1}{2}$ ) A- layer                                            | 6          | 422(1), 322(1), 311(1), 211(1), 200(2)         |
| (0001)-(10 $\bar{1}$ 0)-edge $\equiv$ <i>tetra. edge</i>                          | 6          | 311(4), 211(2)                                 |
| (0001)-(1 $\bar{1}$ 00) -edge                                                     | 5          | 311(2), 211(1), 100(2)                         |
| (0001)-(10 $\bar{1}$ 0) - (1 $\bar{1}$ 00) -vertex $\equiv$ <i>octa.</i>          | 6          | 421(1), 311(2), 211(2), 200(1)                 |
